# Supplementary material
Source: PubMed Central journal article supplement (PMC4176349)
Supplement: supp_gku766_nar-01159-v-2014-File003.pdf [file supp_gku766_nar-01159-v-2014-File003.pdf]

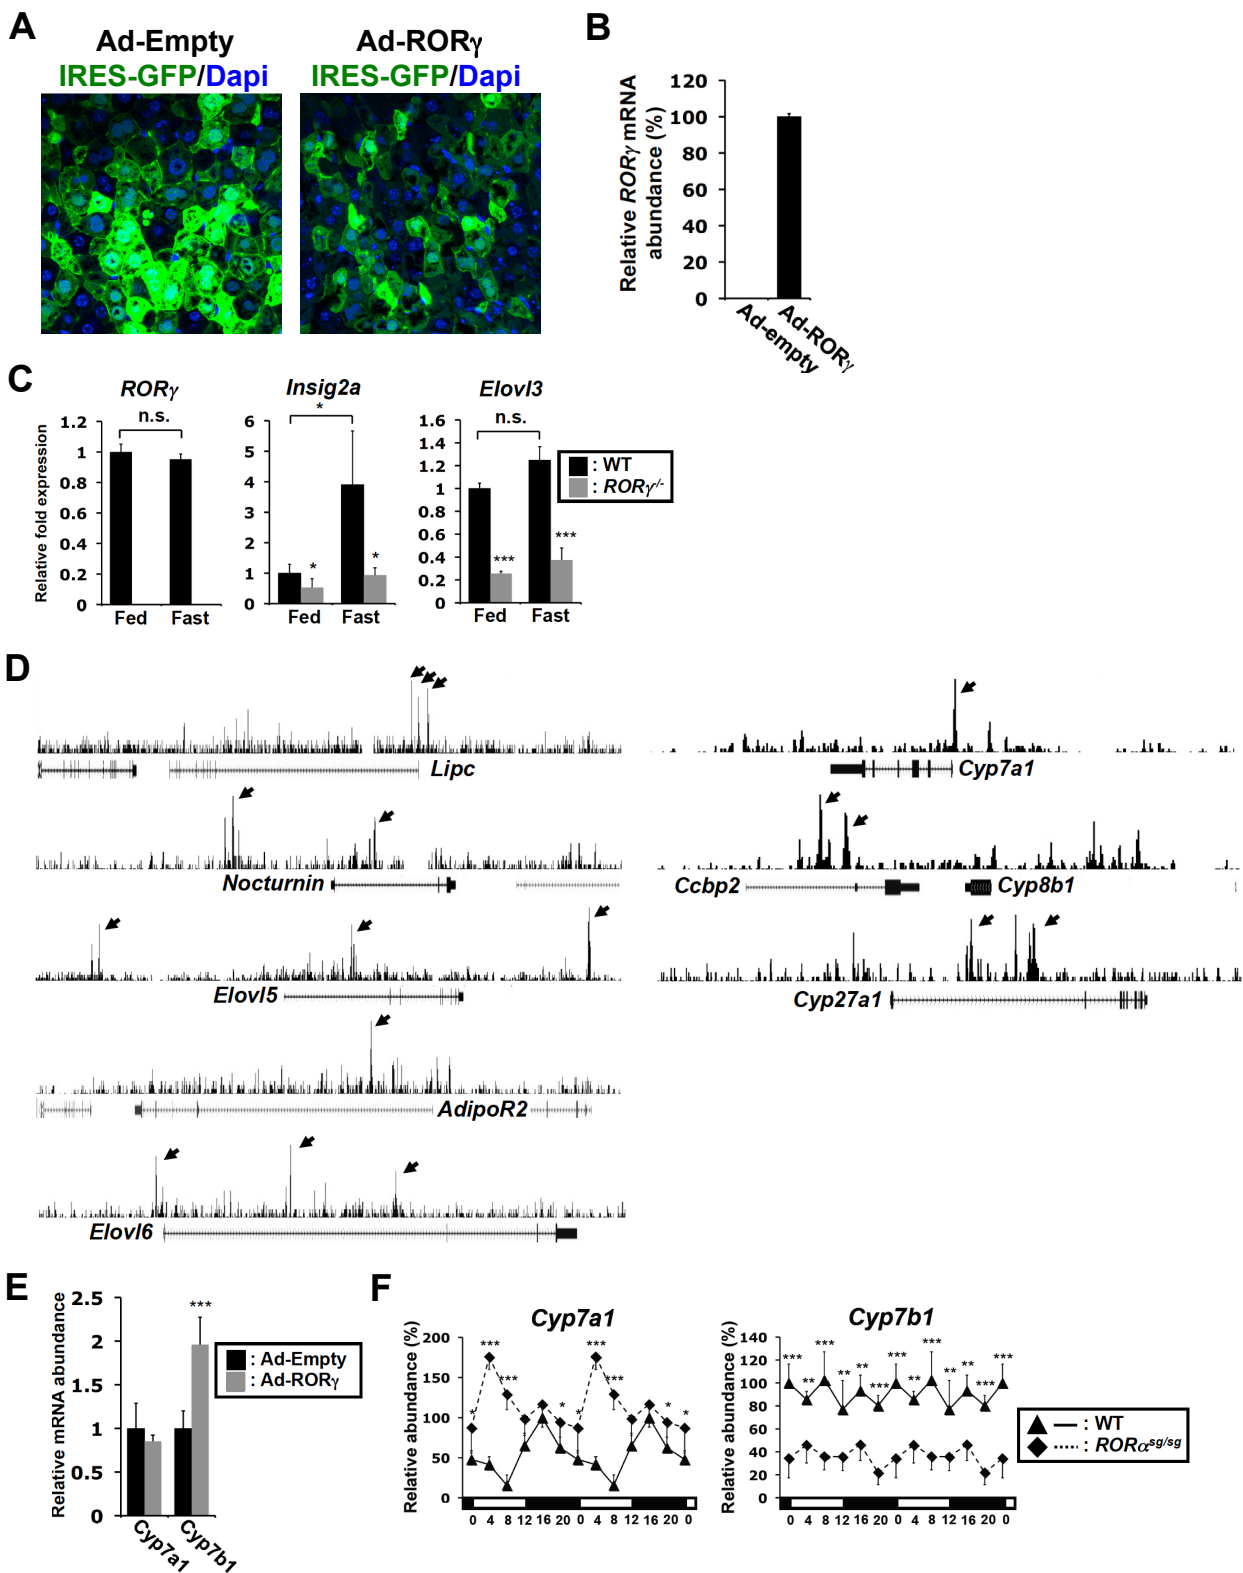

Supplementary Figure S1

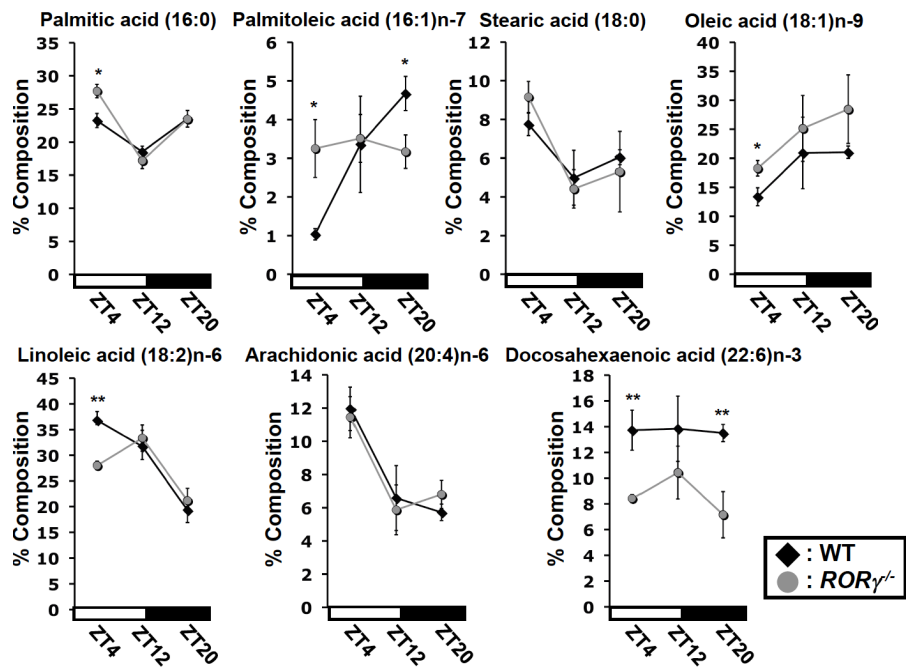

**Supplementary Figure S2**

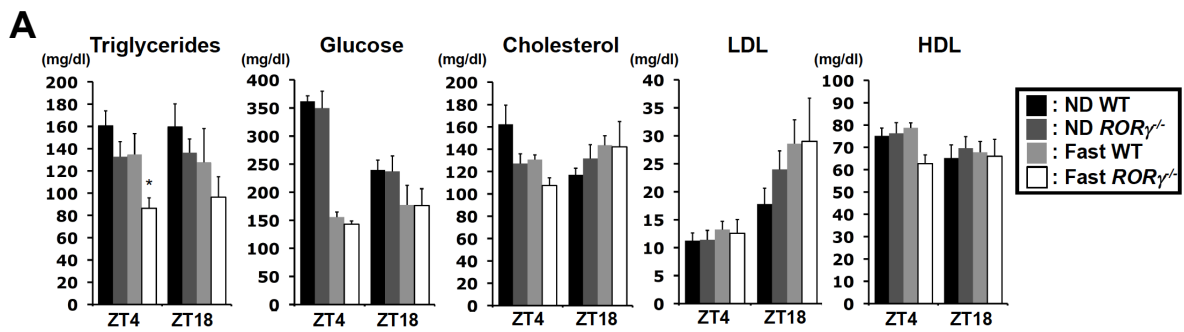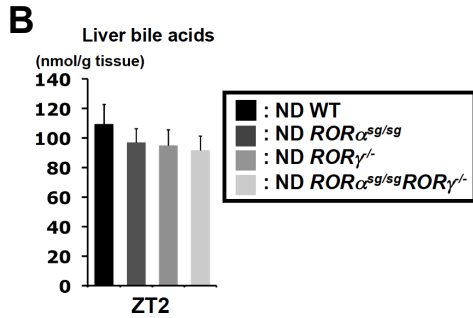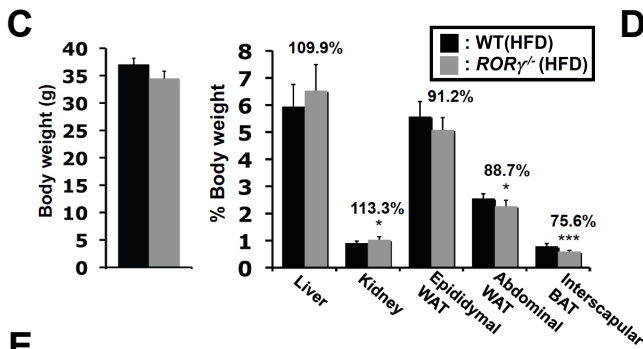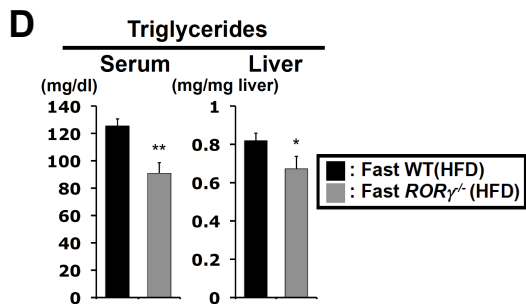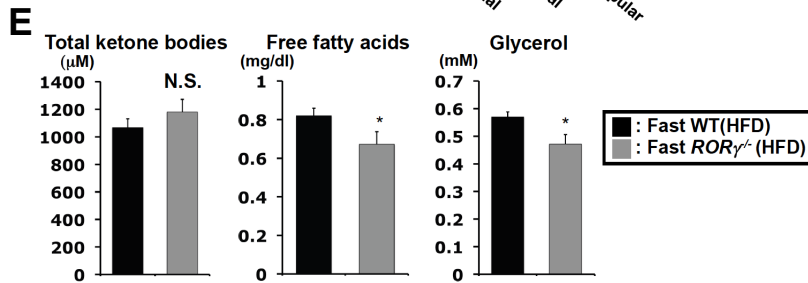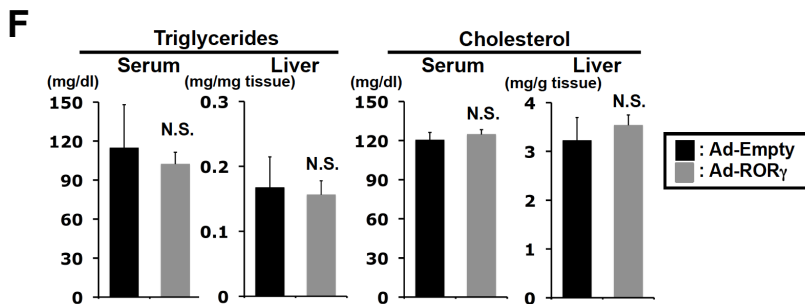

Supplementary Figure S3

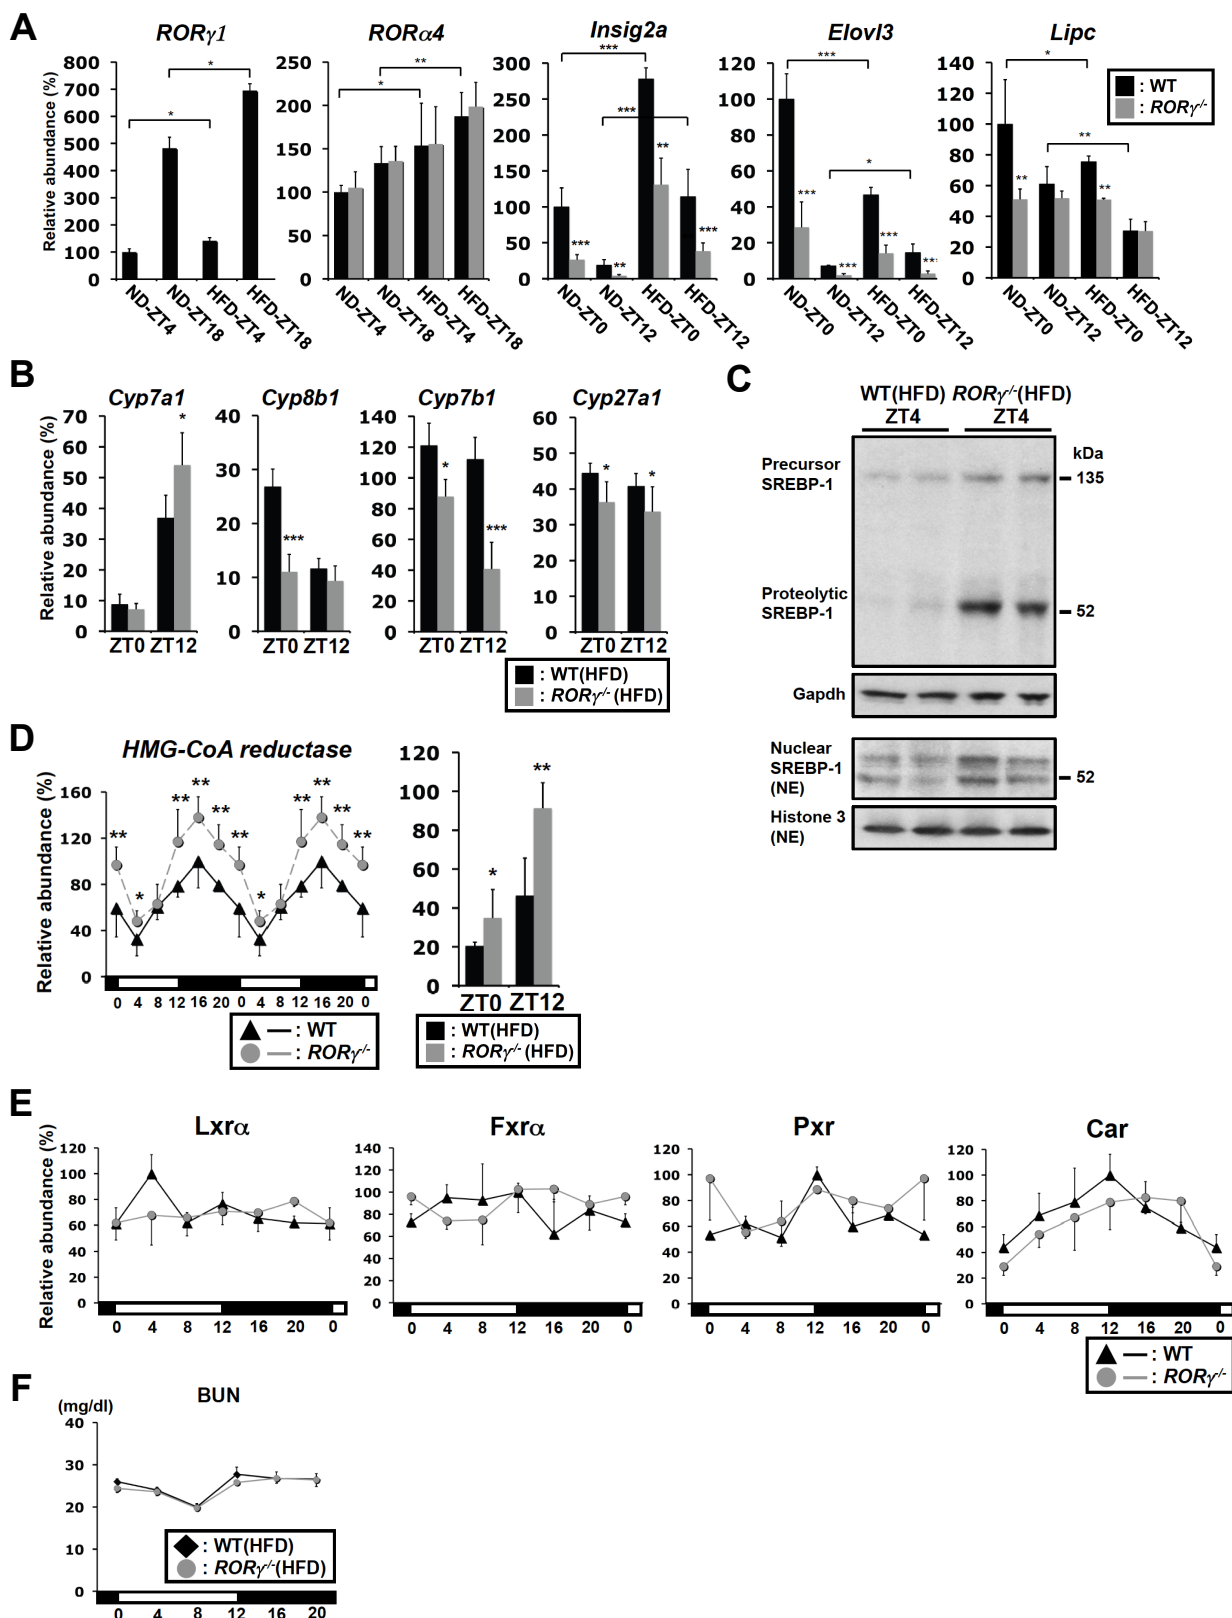

Supplementary Figure S4

**A**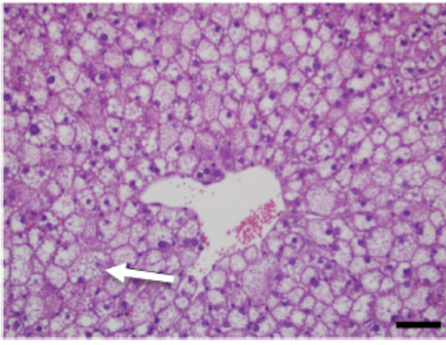

HFD WT liver, x20, H&amp;E.

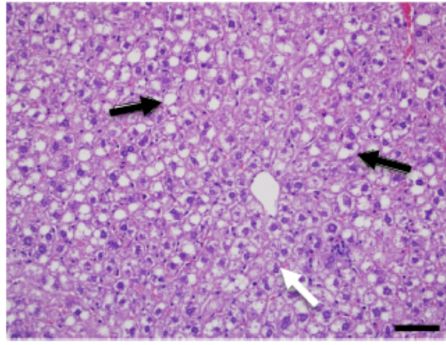HFD  $ROR\gamma^{-/-}$  liver, x20, H&E.**B**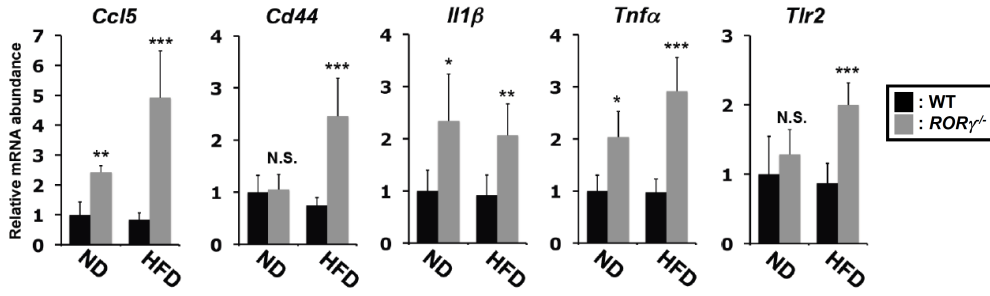**Supplementary Figure S5**
